# Supplementary material for: Blast-induced axonal degeneration in the rat cerebellum in the absence of head movement
Source: PubMed Central journal article supplement (PMC8741772; doi:10.1038/s41598-021-03744-4), 2022-01-07

## Supplementary Information

### **Blast-induced axonal degeneration in the rat cerebellum in the absence of head movement**

#Robin Bishop, Seok Joon Won, Karen-Amanda Irvine, Jayinee Basu, Eric S. Rome, Raymond A. Swanson

#Robin Bishop and Seok Joon Won contributed equally to this work.

### **Supplemental Figure Legends**

**Supplemental Video S1. Video of rat blast exposure with head-movement holster.**

**Supplemental Video S2. Video of rat blast exposure with head-fixed holster.**

Representative of six recordings, all showing no detectable linear or rotational head movement.

**Supplemental Figure S1. Absence of silver-stained nerve fibers in cerebral cortex and striatum.** Rectangles in low power views (top) show regions photographed. Silver staining in (a) cerebral cortex and (b) striatum showed no labeled fibers. Scale bar = 30  $\mu\text{m}$ . Images are representative of  $n = 3$  rats treated at each time point after exposure to blast with head movement allowed.

**Supplemental Figure S2. Absence of silver-stained nerve fibers in hippocampus and corpus callosum.** Rectangles in low power views (top) show regions photographed. Silver staining in (a) hippocampal CA1 and (b) corpus callosum showed no labeled fibers. Scale bar = 30  $\mu\text{m}$ . Images are representative of  $n = 3$  rats treated at each time point after exposure to blast with head movement allowed.

**Supplemental Figure S3. Morphological and APP markers of axonal injury.** All images are from superficial cerebellar white matter, with the cellular layer at the bottom of the image. Rats were exposed to blast with no head movement, and brains harvested 3 days later. (a) High magnification view of silver staining shows focal varicosities in some fibers (red arrowheads). (b) Immunostaining for neurofilament-H shows axonal varicosities in blast exposed brains (top, black arrowheads), but not in controls (bottom). (c) Immunostaining for amyloid precursor protein (APP) shows scattered foci of accumulation in the blast-exposed brains (top, black arrowheads), but not in the sham blast controls (bottom). Images are representative of sections taken from 3 brains under each condition. Scale bar = 30  $\mu\text{m}$ .

Supplemental Figure S1

**a** Cerebral cortex

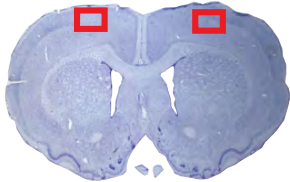

ipsi

contra

1 d

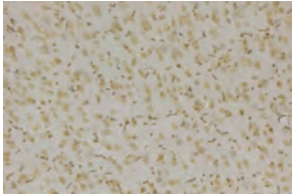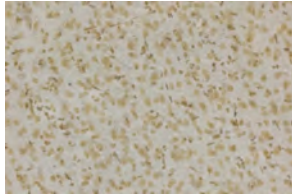

3 d

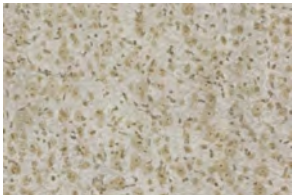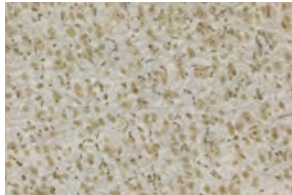

7 d

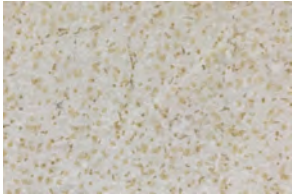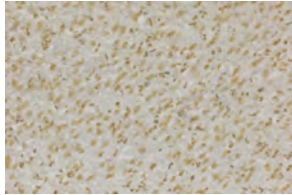

30 d

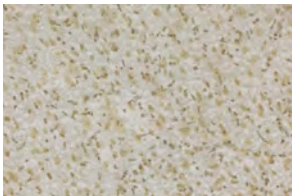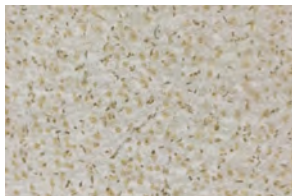

Sham

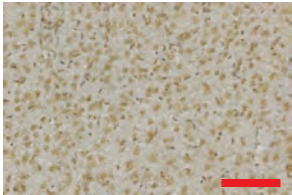

**b** Striatum

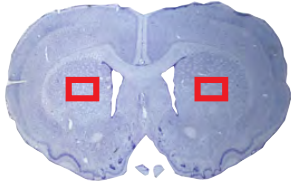

ipsi

contra

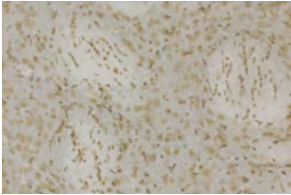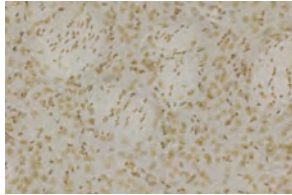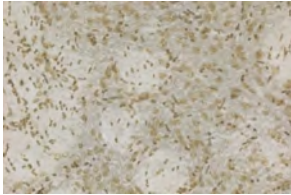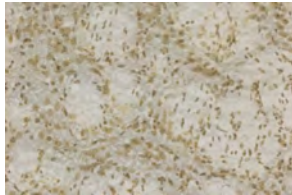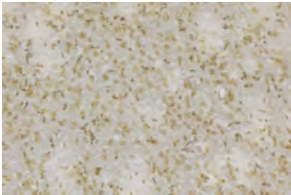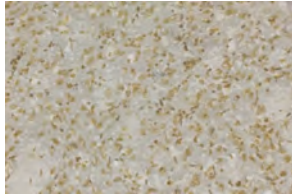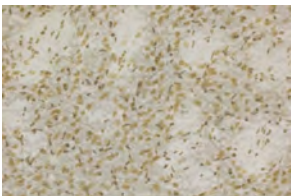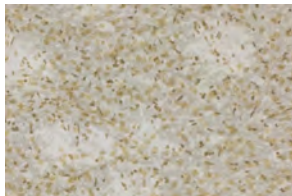

Sham

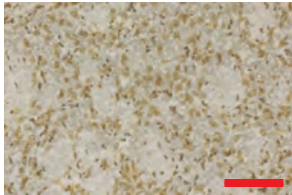

# Supplemental Figure S2

**a** CA1

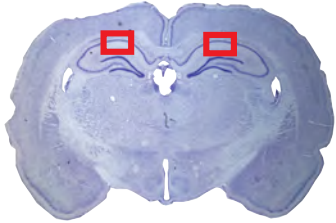

ipsi                      contra

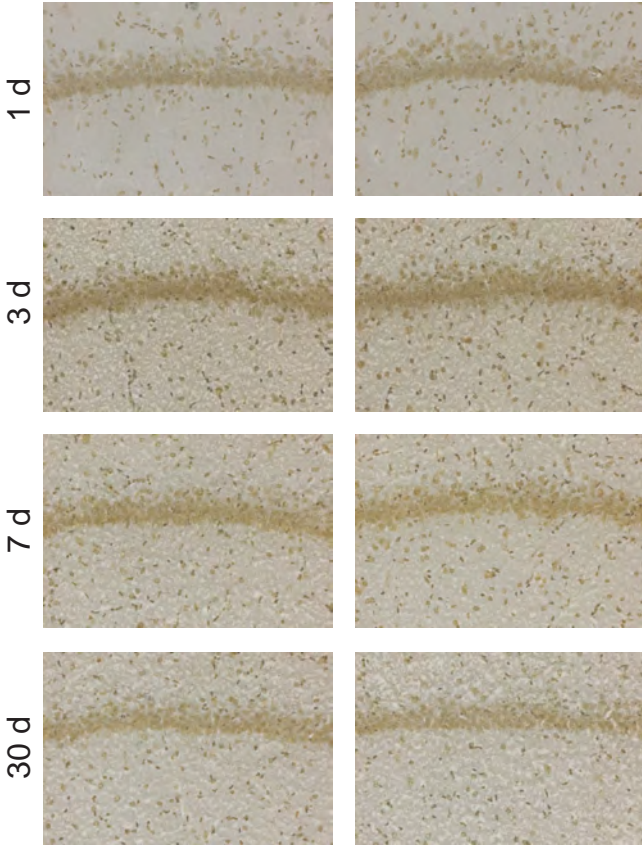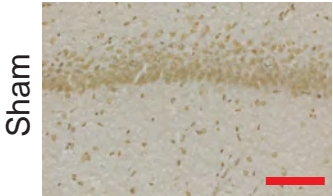

**b** Corpus callosum

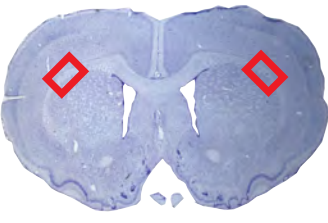

ipsi                      contra

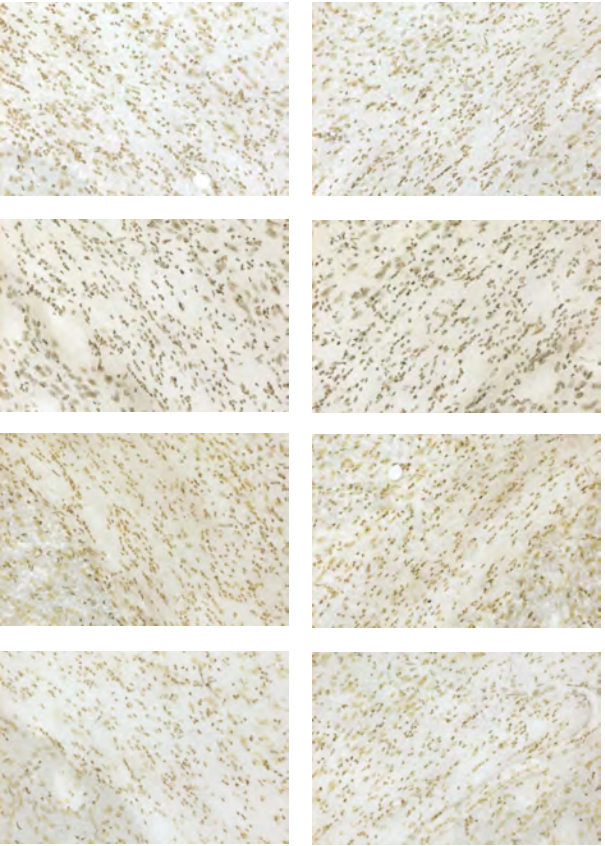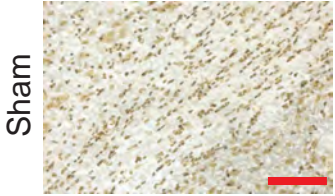

# Supplemental Figure S3

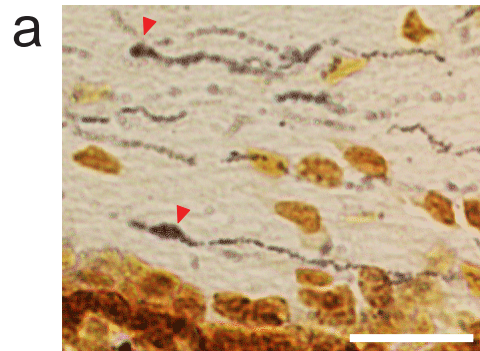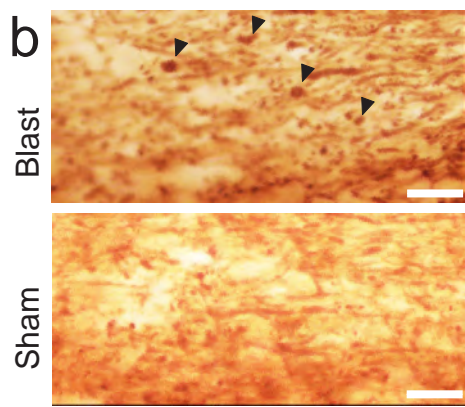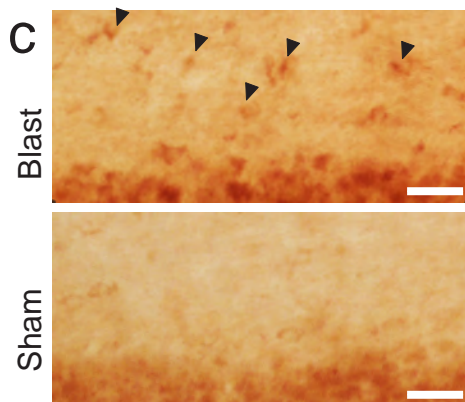

Supplement: 41598_2021_3744_MOESM3_ESM.pdf [file 41598_2021_3744_MOESM3_ESM.pdf]
